# Supplementary material for: Identification of QTLs conferring resistance to downy mildew in legacy cultivars of lettuce
Source: PubMed Central journal article supplement (PMC3791445; doi:10.1038/srep02875), 2013-10-07

Supplementary Information

**Identification of QTLs conferring resistance to downy mildew in legacy cultivars of lettuce**

Ivan Simko<sup>1\*</sup>, Amy J. Atallah<sup>1</sup>, Oswaldo E. Ochoa<sup>2</sup>, Rudie Antonise<sup>3</sup>, Carlos H. Galeano<sup>1,2</sup>, Maria-Jose Truco<sup>2</sup>, and Richard W. Michelmore<sup>2</sup>

<sup>1</sup> U.S. Department of Agriculture, Agricultural Research Service, U.S. Agricultural Research Station, 1636 E. Alisal St, Salinas, CA 93905, USA

<sup>2</sup> The Genome Center and Department of Plant Sciences, University of California, Davis, CA 95616, USA

<sup>3</sup> Keygene N.V., P.O. Box 216 6700 AE Wageningen, The Netherlands

\* Corresponding author

Supplementary Table

Table S1: **Correlation coefficients of traits means.** Pearson's coefficient is above black diagonal; Spearman's coefficient is below diagonal. Significance level is indicated by darker green color.

| Experiment | Week | Evaluation  | F-2008 | F-2009 | F-2009 | F-2009 | F-2009 | F-2009 | F-2011 | F-2011 | F-2011 | F-2011 | F-2011 | F-2012a | F-2012b | F-2012b | F-2012b | F-2012b | F-2012b | F-2012b | L-2012a | L-2012b     | Integrated  |       |
|------------|------|-------------|--------|--------|--------|--------|--------|--------|--------|--------|--------|--------|--------|---------|---------|---------|---------|---------|---------|---------|---------|-------------|-------------|-------|
|            |      |             | WK1    | WK1    | WK3    | WK3    | WK5    | WK5    | WK1    | WK2    | WK2    | WK5    | WK5    | WK1     | WK1     | WK1     | WK2     | WK3     | WK3     | WK3     | WK3     | WK1         | WK1         | n.a.  |
|            |      |             | Rating | Rating | Rating | AUDPS  | Rating | AUDPS  | Rating | Rating | AUDPS  | Rating | AUDPS  | Rating  | Rating  | Rating  | AUDPS   | Rating  | AUDPS   | Rating  | AUDPS   | Sporulation | Sporulation | 0-100 |
| F-2008     | WK1  | Rating      |        | 0.36   | 0.35   | 0.41   | 0.42   | 0.43   | 0.50   | 0.54   | 0.56   | 0.45   | 0.52   | 0.53    | 0.02    | 0.31    | 0.28    | 0.44    | 0.42    | 0.23    | -0.05   | 0.67        |             |       |
| F-2009     | WK1  | Rating      | 0.42   |        | 0.48   | 0.82   | 0.44   | 0.78   | 0.31   | 0.30   | 0.33   | 0.28   | 0.32   | 0.28    | -0.07   | 0.21    | 0.16    | 0.32    | 0.28    | 0.28    | 0.10    | 0.47        |             |       |
| F-2009     | WK3  | Rating      | 0.36   | 0.49   |        | 0.88   | 0.65   | 0.89   | 0.39   | 0.45   | 0.45   | 0.32   | 0.39   | 0.21    | -0.05   | 0.21    | 0.17    | 0.25    | 0.24    | 0.27    | 0.11    | 0.38        |             |       |
| F-2009     | WK3  | AUDPS       | 0.42   | 0.83   | 0.89   |        | 0.65   | 0.99   | 0.41   | 0.45   | 0.46   | 0.35   | 0.42   | 0.28    | -0.07   | 0.24    | 0.19    | 0.33    | 0.30    | 0.32    | 0.12    | 0.45        |             |       |
| F-2009     | WK5  | Rating      | 0.39   | 0.43   | 0.64   | 0.64   |        | 0.74   | 0.39   | 0.47   | 0.46   | 0.41   | 0.46   | 0.41    | 0.01    | 0.28    | 0.25    | 0.36    | 0.35    | 0.25    | 0.08    | 0.42        |             |       |
| F-2009     | WK5  | AUDPS       | 0.44   | 0.80   | 0.90   | 0.99   | 0.76   |        | 0.43   | 0.48   | 0.49   | 0.38   | 0.45   | 0.32    | -0.06   | 0.26    | 0.21    | 0.35    | 0.33    | 0.33    | 0.12    | 0.46        |             |       |
| F-2011     | WK1  | Rating      | 0.47   | 0.32   | 0.40   | 0.41   | 0.32   | 0.41   |        | 0.73   | 0.85   | 0.61   | 0.67   | 0.47    | 0.04    | 0.40    | 0.36    | 0.35    | 0.41    | 0.26    | 0.09    | 0.55        |             |       |
| F-2011     | WK2  | Rating      | 0.52   | 0.31   | 0.46   | 0.44   | 0.39   | 0.46   | 0.66   |        | 0.94   | 0.84   | 0.89   | 0.43    | 0.02    | 0.37    | 0.32    | 0.44    | 0.44    | 0.38    | 0.22    | 0.65        |             |       |
| F-2011     | WK2  | AUDPS       | 0.54   | 0.34   | 0.47   | 0.46   | 0.39   | 0.47   | 0.91   | 0.94   |        | 0.79   | 0.92   | 0.48    | 0.03    | 0.41    | 0.37    | 0.43    | 0.46    | 0.35    | 0.18    | 0.65        |             |       |
| F-2011     | WK5  | Rating      | 0.45   | 0.31   | 0.35   | 0.37   | 0.39   | 0.38   | 0.57   | 0.84   | 0.80   |        | 0.98   | 0.38    | 0.09    | 0.32    | 0.31    | 0.39    | 0.41    | 0.43    | 0.22    | 0.65        |             |       |
| F-2011     | WK5  | AUDPS       | 0.49   | 0.32   | 0.36   | 0.38   | 0.37   | 0.40   | 0.76   | 0.93   | 0.88   | 0.97   |        | 0.44    | 0.07    | 0.37    | 0.35    | 0.43    | 0.45    | 0.42    | 0.21    | 0.67        |             |       |
| F-2012a    | WK1  | Rating      | 0.55   | 0.30   | 0.21   | 0.26   | 0.39   | 0.29   | 0.45   | 0.41   | 0.45   | 0.40   | 0.44   |         | 0.12    | 0.44    | 0.42    | 0.57    | 0.58    | 0.27    | 0.07    | 0.75        |             |       |
| F-2012b    | WK1  | Rating      | 0.03   | -0.03  | -0.05  | -0.06  | 0.06   | -0.04  | 0.14   | 0.09   | 0.12   | 0.12   | 0.11   | 0.16    |         | 0.23    | 0.55    | 0.15    | 0.38    | 0.01    | 0.32    | 0.18        |             |       |
| F-2012b    | WK2  | Rating      | 0.36   | 0.23   | 0.19   | 0.19   | 0.25   | 0.21   | 0.43   | 0.38   | 0.42   | 0.35   | 0.37   | 0.50    | 0.31    |         | 0.95    | 0.52    | 0.82    | 0.18    | 0.15    | 0.56        |             |       |
| F-2012b    | WK2  | AUDPS       | 0.31   | 0.18   | 0.13   | 0.13   | 0.22   | 0.16   | 0.41   | 0.35   | 0.40   | 0.35   | 0.36   | 0.49    | 0.52    | 0.95    |         | 0.50    | 0.86    | 0.16    | 0.24    | 0.55        |             |       |
| F-2012b    | WK3  | Rating      | 0.44   | 0.41   | 0.26   | 0.33   | 0.29   | 0.34   | 0.33   | 0.36   | 0.36   | 0.35   | 0.35   | 0.55    | 0.14    | 0.52    | 0.51    |         | 0.88    | 0.38    | 0.08    | 0.83        |             |       |
| F-2012b    | WK3  | AUDPS       | 0.45   | 0.33   | 0.25   | 0.27   | 0.32   | 0.30   | 0.43   | 0.42   | 0.44   | 0.41   | 0.42   | 0.61    | 0.38    | 0.84    | 0.84    | 0.88    |         | 0.31    | 0.18    | 0.81        |             |       |
| L-2012a    | WK1  | Sporulation | 0.22   | 0.34   | 0.30   | 0.36   | 0.22   | 0.36   | 0.28   | 0.37   | 0.37   | 0.40   | 0.40   | 0.21    | 0.05    | 0.16    | 0.15    | 0.36    | 0.31    |         | 0.18    | 0.53        |             |       |
| L-2012b    | WK1  | Sporulation | -0.01  | 0.09   | 0.09   | 0.10   | 0.08   | 0.10   | 0.15   | 0.26   | 0.26   | 0.21   | 0.22   | 0.10    | 0.28    | 0.15    | 0.22    | 0.09    | 0.18    | 0.19    |         | 0.33        |             |       |
| Integrated | n.a. | 0-100       | 0.66   | 0.40   | 0.37   | 0.44   | 0.47   | 0.48   | 0.55   | 0.68   | 0.67   | 0.67   | 0.70   | 0.72    | 0.21    | 0.55    | 0.55    | 0.83    | 0.80    | 0.54    | 0.31    |             |             |       |

P  
E  
A  
R  
S  
O  
N

S P E A R M A N

Significant at P-value  
 < 0.05  
 < 0.01  
 < 0.001

Supplementary Information

**Identification of QTLs conferring resistance to downy mildew in legacy cultivars of lettuce**

Ivan Simko<sup>1\*</sup>, Amy J. Atallah<sup>1</sup>, Oswaldo E. Ochoa<sup>2</sup>, Rudie Antonise<sup>3</sup>, Carlos H. Galeano<sup>1,2</sup>, Maria-Jose Truco<sup>2</sup>, and Richard W. Michelmore<sup>2</sup>  
<sup>1</sup> U.S. Department of Agriculture, Agricultural Research Service, U.S. Agricultural Research Station, 1636 E. Alisal St, Salinas, CA 93905, USA

<sup>2</sup> The Genome Center and Department of Plant Sciences, University of California, Davis, CA 95616, USA

<sup>3</sup> Keygene N.V., P.O. Box 216 6700 AE Wageningen, The Netherlands

\* Corresponding author

Supplementary Figure

Figure S2: **Avirulence genes detected in *B. lactucae* isolates.** Fifty-eight samples of the pathogen were collected in Salinas during 2008 - 2012 period. The avirulence genes that were never detected are *Avr5/8*, *Avr7*, *Avr11*, *Avr12*, *Avr13*, *Avr14*, *Avr15*, *Avr18*, *Avr18/32*, and *Avr40*.

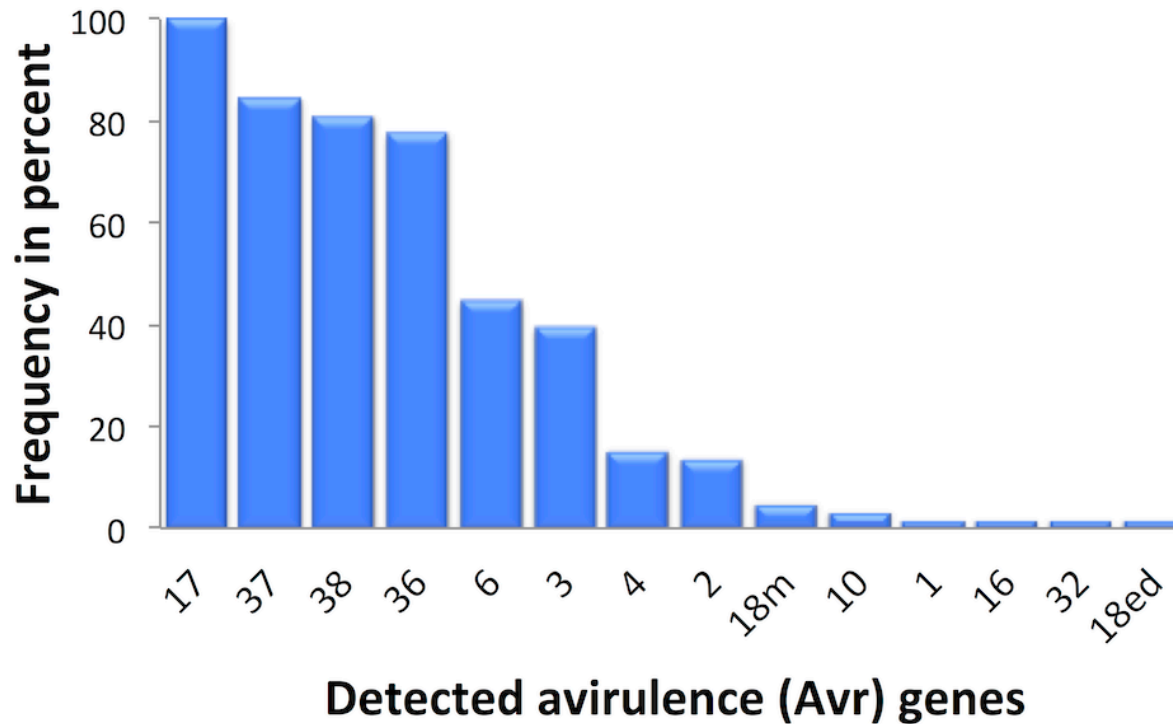

Supplement: srep02875-s1.pdf [file srep02875-s1.pdf]
